# Supplementary material for: Synergy between dihydromyricetin intervention and irinotecan chemotherapy delays the progression of colon cancer in mouse models
Source: Royal Society of Chemistry journal article supplement (doi:10.1039/c8fo01756e), 2019-01-01
Supplement: c8fo01756e1.pdf [file c8fo01756e1.pdf]

| primer | Sequence 5'to3'       | size | type                               |
|--------|-----------------------|------|------------------------------------|
| WTF    | GCCATCCCTTCACGTTAG    | 600b | C57BL/6J wild-type                 |
| WTR    | TTCCACTTTGGCATAAGGC   | p    |                                    |
| APCR   | TTCCACTTTGGCATAAGGC   | 340b | Apc min/+ (C57BL/6J) mutation mice |
| APCF   | TTCTGAGAAAGACAGAAGTTA | p    |                                    |

Supplemental Table 1 Specific primers used to characterize the WT and Apc mutant mice

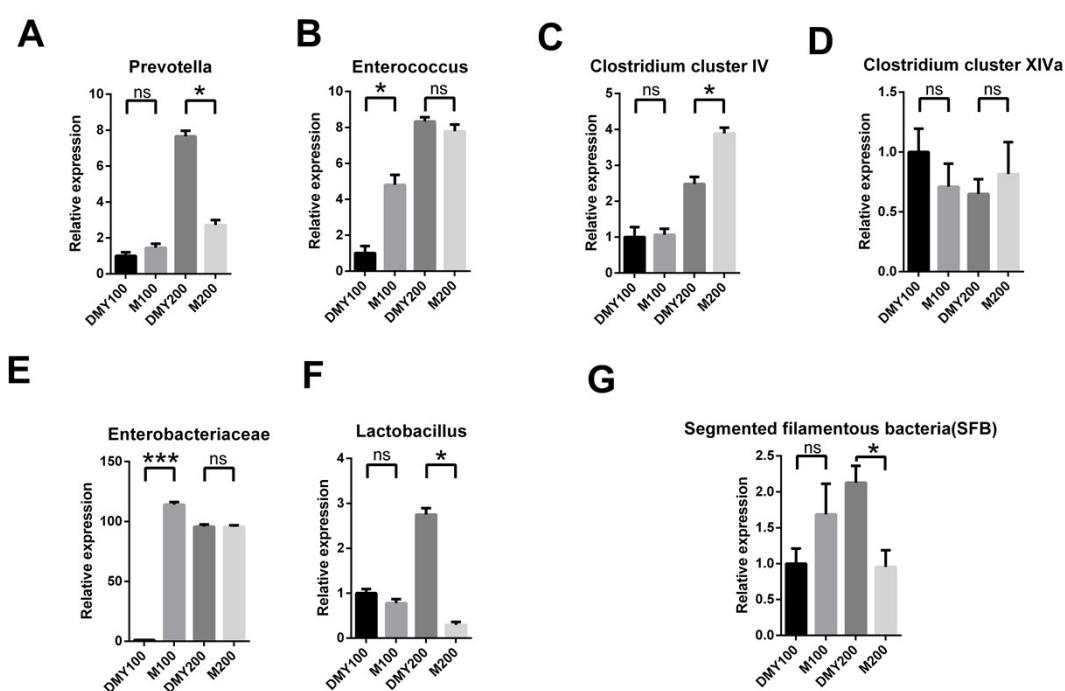

**Supplemental Figure 1.** Gut microbial qPCR of (A) *Prevotella*, (B) *Enterococcus*, (C) *Clostridium* cluster IV, (D) *Clostridium* cluster XIVa, (E) *Enterobacteriaceae*, (F) *Lactobacillus* and (G) Segmented filamentous bacteria(SFB). n=5-6.  $P < 0.05$ ; \*\*  $P < 0.01$ ; \*\*\*  $P < 0.001$ ; ns, No Significance (as determined by the Unpaired non-parametric Mann-Whitney test).
